# Supplementary material for: 27 years of benthic and coral community dynamics on turbid, highly urbanised reefs off Singapore
Source: PubMed Central journal article supplement (PMC5099948; doi:10.1038/srep36260), 2016-11-08
Supplement: srep36260-s1.pdf [file srep36260-s1.pdf]

# 27 years of benthic and coral community dynamics on turbid, highly urbanised reefs off Singapore

JR Guest, K Tun, J Low, A Vergés, EM Marzinelli, AH Campbell, AG Bauman, DA Feary, LM Chou, PD Steinberg

## Supporting Information

### Methods

#### *Long-term monitoring of benthic and coral community structure*

Initially there were a total of 10 sites used for the benthic surveys, however, 6 of these were not resurveyed after 2003 (H1, HW2, L2, L4, R1, S1) and they were replaced by 5 sites (J1, K1, PSD1, PSL3, S4) that were considered similar in terms of coral community structure. The reasons why sites were not resurveyed were purely logistical and included: limited access due to land reclamation works (e.g., major reclamation at sites S1, L2, L4 and H1 prevented access to those sites) and safety concerns due to boat traffic (e.g., site R1). Not all sites were surveyed in all years (see Table S1) resulting in certain years having surveys at only a limited number of sites. Therefore, to ensure that a representative range of sites were included at each time point, sites were pooled within year groups where necessary so that each year group contained at least six sites. Years that were grouped for shallow sites were 1988-1990, 1991-1992, 1997-1998, 1999-2000 & 2006-2007; and for deep sites were 1986-1988, 1991-1992, 1997-1998, 1999-2000, 2002-2003, 2005-2006, 2007-2008, 2009-2010 & 2011-2012.

### Results

#### *Average values for benthic categories at shallow and deep sites*

On shallow (~3-4 m) reefs the mean cover of hard coral and macroalgae across all years and sites was 35.8% (SD  $\pm$  7.2%) and 10.1% (SD  $\pm$  3.6%) respectively. The mean cover of EAM was relatively high at 21.8% (SD  $\pm$  2.9%), while mean cover of CCA was 0.4% (SD  $\pm$  0.60%) and other biota (i.e., sponges, soft corals and zooanthids) was 4.6% (SD  $\pm$  1.4%) were relatively low at shallow sites. A high proportion of the benthos (mean cover 21.5 SD  $\pm$  5.0%) was composed of unconsolidated dead coral fragments, i.e., rubble, with only 4.6% (SD  $\pm$  1.4%) composed of other abiotic substrata (e.g., sand, silt, rock). On deep (~6-7 m) reefs, mean coral cover across all years was 20.8% (SD  $\pm$  9.8%) and mean cover of macroalgae was 3.1% (SD  $\pm$  2.79%). Mean cover of EAM was 23.9% (SD  $\pm$  5.1%), cover of CCA was 1.2% (SD  $\pm$  1.2%) while mean cover of other biota was 2.9% (SD  $\pm$  1.1%). Mean cover of rubble was 31.8% (SD  $\pm$  9.1%) while mean cover of other abiotic substrata was 16.6% (SD  $\pm$  10.1%) (Table S1 & S2).

45  
46  
47  
48

Table S1. Percentage cover of hard coral and macroalgae at all shallow sites showing sites and years surveyed. Values are total % cover for each site and year or year group. Numbers in parentheses are SD.

| <b>Hard Coral</b>         |             |                  |                  |             |                  |                  |             |                  |                  |             |             |             |             |             |
|---------------------------|-------------|------------------|------------------|-------------|------------------|------------------|-------------|------------------|------------------|-------------|-------------|-------------|-------------|-------------|
| <b>Island</b>             | <b>Site</b> | <b>1988-1990</b> | <b>1991-1992</b> | <b>1993</b> | <b>1997-1998</b> | <b>1999-2000</b> | <b>2003</b> | <b>2004-2005</b> | <b>2006-2007</b> | <b>2008</b> | <b>2009</b> | <b>2010</b> | <b>2011</b> | <b>2012</b> |
| <b>Pulau Hantu</b>        | H1          | 31.3(19.7)       | 8.4(5.8)         | 10.2(12.6)  | 10.2(9.9)        |                  | 8.6(2.4)    |                  |                  |             |             |             |             |             |
|                           | H2          | 49.1(14.0)       | 48.7(26.5)       | 41.1(19.6)  | 36.0(17.4)       |                  | 46.8(11.8)  | 34.3(6.8)        | 39.0(11.5)       | 46.1(12.5)  | 39.2(16.0)  | 38.5(13.7)  | 36.7(8.4)   | 48.8(17.8)  |
| <b>Hantu West</b>         | HW1         | 41.5(16.6)       | 37.3(16.5)       | 41.6(18.2)  | 19.8(5.8)        |                  | 16.7(2.3)   | 20.8(7.4)        | 22.6(2.3)        |             | 22.5(7.0)   | 20.6(4.9)   | 20.6(6.4)   |             |
|                           | HW2         | 70.4(18.9)       | 63.9(10.3)       | 61.6(19.7)  | 33.8(7.8)        |                  | 43.5(13.9)  |                  |                  |             |             |             |             |             |
| <b>Pulau Jong</b>         | J1          |                  |                  |             |                  |                  |             |                  | 34.9(7.4)        | 30.5(5.5)   | 16.4(12.1)  |             | 23.1(8.2)   | 21.6(6.0)   |
| <b>Kusu Island</b>        | K1          |                  |                  |             |                  |                  | 22.9(8.6)   | 48.4(17.3)       | 40.6(12.5)       | 48.4(10.8)  | 54.9(10.4)  | 45.6(18.4)  | 44.1(11.9)  | 56.6(12.7)  |
| <b>Lazarus</b>            | L2          | 60.8(13.7)       | 47.3(15.7)       | 21.6(13.2)  | 21.6(3.6)        | 25.9(9.7)        |             |                  |                  |             |             |             |             |             |
|                           | L4          | 2.6(5.4)         | 3.3(3.0)         | 7.1(11.3)   | 0.2(0.4)         | 1.6(1.5)         | 4.1(2.7)    |                  |                  |             |             |             |             |             |
| <b>Sisters Island</b>     | PSD1        |                  |                  |             |                  |                  |             | 39.6(6.4)        |                  | 41.9(15.1)  |             |             | 29.6(16.7)  | 29.6(14.3)  |
|                           | PSL3        |                  |                  |             |                  |                  |             | 32.0(5.9)        | 27.0(6.9)        | 34.7(13.2)  |             | 25.1(4.1)   | 21.8(7.1)   | 26.4(7.1)   |
| <b>Raffles Lighthouse</b> | R1          | 76.5(12.0)       | 78.3(10.1)       | 73.4(8.6)   | 48.4(11.4)       | 38.1(8.0)        | 56.2(7.8)   |                  |                  |             |             |             |             |             |
|                           | R2          | 75.9(20.2)       | 67.0(8.6)        | 75.2(11.2)  |                  | 50.9(12.1)       |             | 56.9(13.7)       | 60.5(6.7)        | 65.8(11.5)  | 72.2(11.1)  | 50.7(8.4)   |             | 56.0(9.1)   |
| <b>Semakau</b>            | S1          | 26.1(14.1)       | 19.1(9.4)        | 8.9(10.3)   | 9.9(8.6)         | 12.2(5.6)        | 23.4(10.0)  |                  |                  |             |             |             |             |             |
|                           | S2          | 51.8(21.1)       | 59.6(4.8)        | 56.3(10.5)  | 40.6(10.3)       | 23.1(4.2)        | 24.8(6.1)   |                  |                  | 24.0(11.2)  |             | 27.7(9.0)   | 33.7(10.3)  | 36.0(8.7)   |
|                           | S4          |                  |                  |             |                  |                  |             |                  | 25.9(6.5)        | 28.8(11.5)  | 29.5(8.7)   | 20.3(12.0)  | 33.8(19.1)  | 21.3(10.3)  |
| <b>Macroalgae</b>         |             |                  |                  |             |                  |                  |             |                  |                  |             |             |             |             |             |
| <b>Pulau Hantu</b>        | H1          | 13.3(14.7)       | 3.3(4.9)         | 17.4(11.2)  | 17.2(8.5)        |                  | 11.4(10.2)  |                  |                  |             |             |             |             |             |
|                           | H2          | 7.4(10.1)        | 10.3(14.8)       | 6.0(3.8)    | 26.2(13.4)       |                  | 12.8(8.4)   | 14.8(6.2)        | 12.8(17.8)       | 4.5(4.5)    | 12.2(8.1)   | 22.4(13.3)  | 13.5(6.7)   | 6.8(5.7)    |
| <b>Hantu West</b>         | HW1         | 12.5(6.9)        | 1.4(1.1)         | 9.1(6.6)    | 16.8(4.9)        |                  | 13.0(4.4)   | 21.4(9.1)        | 12.8(9.2)        |             | 20.3(3.9)   | 18.0(1.4)   | 10.2(6.8)   |             |
|                           | HW2         | 0.2(0.4)         | 0.1(0.3)         | 0.4(0.8)    | 14.3(7.6)        |                  | 4.4(4.0)    |                  |                  |             |             |             |             |             |
| <b>Pulau Jong</b>         | J1          |                  |                  |             |                  |                  |             |                  | 23.2(18.2)       | 9.8(7.3)    | 13.2(2.3)   |             | 10.1(6.6)   | 34.6(12.3)  |

|                           |      |            |            |            |            |            |           |          |          |            |            |           |           |          |
|---------------------------|------|------------|------------|------------|------------|------------|-----------|----------|----------|------------|------------|-----------|-----------|----------|
| <b>Kusu Island</b>        | K1   |            |            |            |            |            | 12.8(7.7) | 0.3(0.5) | 0.2(0.4) | 0.0(0.0)   | 0.4(0.3)   | 0.8(1.0)  | 1.9(1.6)  | 1.3(0.9) |
| <b>Lazarus</b>            | L2   | 0.0(0.0)   | 0.5(0.6)   | 11.5(9.9)  | 3.2(2.6)   | 9.9(5.8)   |           |          |          |            |            |           |           |          |
|                           | L4   | 9.8(6.8)   | 11.5(12.9) | 2.2(2.0)   | 9.0(6.5)   | 20.2(3.1)  | 19.0(3.4) |          |          |            |            |           |           |          |
| <b>Sisters Island</b>     | PSD1 |            |            |            |            |            |           | 2.4(4.0) |          | 1.8(1.9)   |            |           | 12.5(7.4) | 0.6(0.5) |
|                           | PSL3 |            |            |            |            |            |           | 0.8(0.8) | 3.5(2.7) | 2.4(2.8)   |            | 0.3(0.3)  | 2.4(3.8)  | 9.9(6.1) |
| <b>Raffles Lighthouse</b> | R1   | 0.0(0.0)   | 0.7(0.9)   | 0.0(0.0)   | 0.9(0.9)   | 17.2(10.4) | 2.4(1.8)  |          |          |            |            |           |           |          |
|                           | R2   | 0.0(0.0)   | 0.7(1.5)   | 0.0(0.0)   |            | 3.4(5.5)   |           | 0.0(0.0) | 0.2(0.3) | 0.7(0.8)   | 0.2(0.3)   | 0.0(0.0)  |           | 0.5(0.4) |
| <b>Semakau</b>            | S1   | 5.7(6.7)   | 4.9(7.8)   | 71.1(20.0) | 10.5(5.0)  | 19.5(6.0)  | 3.6(3.0)  |          |          |            |            |           |           |          |
|                           | S2   | 14.3(11.5) | 0.0(0.0)   | 4.6(3.9)   | 21.5(11.2) | 28.6(8.3)  | 9.2(4.9)  |          |          | 34.6(15.0) |            | 6.1(3.7)  | 12.1(9.0) | 7.5(5.4) |
|                           | S4   |            |            |            |            |            |           | 8.7(8.1) | 9.0(5.1) | 35.0(9.3)  | 21.8(13.2) | 11.6(1.2) | 23.5(6.8) |          |

49

50

51

52

Table S2. Percentage cover of hard coral and macroalgae at all deep sites showing sites and years surveyed. Values are total % cover for all transects for each site and year or year group. Numbers in parentheses are SD.

| <b>Hard Coral</b>         |             |                  |                  |             |                  |                  |             |                  |                  |                  |                  |
|---------------------------|-------------|------------------|------------------|-------------|------------------|------------------|-------------|------------------|------------------|------------------|------------------|
| <b>Island</b>             | <b>Site</b> | <b>1986-1987</b> | <b>1991-1992</b> | <b>1993</b> | <b>1997-1998</b> | <b>1999-2000</b> | <b>2003</b> | <b>2005-2006</b> | <b>2007-2008</b> | <b>2009-2010</b> | <b>2011-2012</b> |
| <b>Pulau Hantu</b>        | H1          | 27.7(17.3)       | 5.5(9.2)         | 16.0(16.1)  | 12.4(5.0)        |                  | 5.5(5.1)    |                  |                  |                  |                  |
|                           | H2          | 52.1(22.9)       | 30.0(13.9)       | 32.9(18.6)  | 24.2(7.5)        |                  | 26.2(6.0)   | 12.4(6.5)        | 15.5(9.0)        | 9.0(5.9)         | 14.0(4.6)        |
| <b>Hantu West</b>         | HW1         | 64.1(11.7)       | 28.0(8.7)        | 25.0(12.7)  | 18.9(7.2)        |                  | 1.6(0.8)    | 16.1(5.7)        | 9.4(5.6)         | 8.8(3.7)         | 6.3(2.6)         |
|                           | HW2         | 37.2(24.0)       | 48.4(5.7)        | 45.3(19.6)  | 27.5(11.1)       |                  | 4.5(3.2)    |                  |                  |                  |                  |
| <b>Pulau Jong</b>         | J1          |                  |                  |             |                  |                  |             | 8.7(4.2)         | 10.7(7.1)        | 9.0(5.7)         | 10.6(7.8)        |
| <b>Kusu Island</b>        | K1          |                  |                  |             |                  |                  | 9.4(3.1)    | 1.2(1.1)         | 12.5(11.9)       | 5.5(3.8)         | 10.9(7.6)        |
| <b>Lazarus</b>            | L2          |                  | 25.7(9.6)        | 16.5(12.5)  | 7.0(2.1)         | 13.2(2.2)        |             |                  |                  |                  |                  |
|                           | L4          |                  | 2.0(2.2)         | 0.6(0.4)    | 1.7(2.5)         | 2.0(2.9)         | 1.5(1.9)    |                  |                  |                  |                  |
| <b>Sisters Island</b>     | PSD1        |                  |                  |             |                  |                  |             | 2.7(0.8)         | 6.0(2.1)         |                  | 7.8(5.6)         |
|                           | PSL3        |                  |                  |             |                  |                  |             |                  | 7.4(2.8)         | 10.4(6.4)        | 9.7(7.4)         |
| <b>Raffles Lighthouse</b> | R1          | 30.6(12.3)       | 41.6(15.8)       | 25.8(13.0)  | 40.5(9.9)        | 27.4(7.8)        | 40.6(13.8)  |                  |                  |                  |                  |

|                           |      |            |            |            |           |            |            |            |            |            |            |
|---------------------------|------|------------|------------|------------|-----------|------------|------------|------------|------------|------------|------------|
|                           | R2   | 45.5(6.5)  | 40.2(14.2) | 55.8(13.3) |           | 40.5(9.6)  | 18.9(10.6) | 38.2(11.4) | 37.0(10.5) | 33.8(12.7) | 41.1(9.9)  |
| <b>Semakau</b>            | S1   | 43.8(15.6) | 15.3(7.1)  | 16.9(11.0) | 7.9(3.4)  | 13.3(3.0)  | 14.3(6.2)  |            |            |            |            |
|                           | S2   | 61.0(6.3)  | 30.7(14.5) | 32.6(12.7) | 22.7(5.7) | 17.8(3.5)  | 11.4(5.4)  |            | 15.4(9.8)  | 22.8(3.3)  | 25.2(11.0) |
|                           | S4   |            |            |            |           |            |            | 15.3(9.7)  | 11.7(8.2)  | 10.8(6.8)  | 14.6(9.2)  |
| <b>Macroalgae</b>         |      |            |            |            |           |            |            |            |            |            |            |
| <b>Pulau Hantu</b>        | H1   | 0.2(0.4)   | 0.3(0.6)   | 3.0(3.5)   | 12.1(9.2) |            | 1.3(1.9)   |            |            |            |            |
|                           | H2   | 10.9(9.2)  | 0.3(0.6)   | 0.1(0.3)   | 11.6(9.3) |            | 4.0(3.4)   | 0.2(0.4)   | 2.8(4.1)   | 1.3(1.6)   | 4.2(6.4)   |
| <b>Hantu West</b>         | HW1  | 0.0(0.0)   | 1.0(1.4)   | 0.6(1.4)   | 0.0(0.0)  |            | 0.0(0.0)   | 0.3(0.5)   | 1.5(1.2)   | 2.1(1.1)   | 1.9(2.1)   |
|                           | HW2  | 0.1(0.2)   | 0.0(0.0)   | 0.0(0.0)   | 14.2(4.6) |            | 0.0(0.0)   |            |            |            |            |
| <b>Pulau Jong</b>         | J1   |            |            |            |           |            |            | 0.6(0.8)   | 3.1(4.7)   | 4.1(0.8)   | 4.0(4.9)   |
| <b>Kusu Island</b>        | K1   |            |            |            |           |            | 3.5(1.7)   | 0.0(0.0)   | 0.3(0.8)   | 0.7(1.2)   | 0.1(0.4)   |
| <b>Lazarus</b>            | L2   |            | 0.4(0.8)   | 0.0(0.0)   | 0.5(0.6)  | 1.7(1.9)   |            |            |            |            |            |
|                           | L4   |            | 0.6(0.5)   | 2.1(2.3)   | 11.1(5.1) | 9.1(8.2)   | 4.3(4.5)   |            |            |            |            |
| <b>Sisters Island</b>     | PSD1 |            |            |            |           |            |            | 0.1(0.2)   | 0.2(0.5)   |            | 8.8(3.9)   |
|                           | PSL3 |            |            |            |           |            |            |            | 1.6(2.6)   | 4.0(4.2)   | 8.3(10.6)  |
| <b>Raffles Lighthouse</b> | R1   | 0.0(0.0)   | 1.8(2.4)   | 0.0(0.0)   | 5.8(3.4)  | 24.3(17.0) | 2.3(0.7)   |            |            |            |            |
|                           | R2   | 0.1(0.3)   | 0.1(0.3)   | 0.6(0.9)   |           | 7.6(6.1)   | 3.5(3.1)   | 0.4(0.2)   | 0.5(0.8)   | 1.5(1.1)   | 2.6(2.4)   |
| <b>Semakau</b>            | S1   | 7.4(7.5)   | 3.0(3.5)   | 2.3(2.6)   | 1.5(1.5)  | 5.6(2.2)   | 3.8(6.1)   |            |            |            |            |
|                           | S2   | 0.0(0.0)   | 0.0(0.0)   | 0.0(0.0)   | 2.6(2.0)  | 2.4(1.7)   | 0.7(0.9)   |            | 0.9(1.3)   | 0.5(0.6)   | 1.8(2.2)   |
|                           | S4   |            |            |            |           |            |            | 0.0(0.0)   | 3.5(5.5)   | 0.0(0.0)   | 3.8(4.1)   |

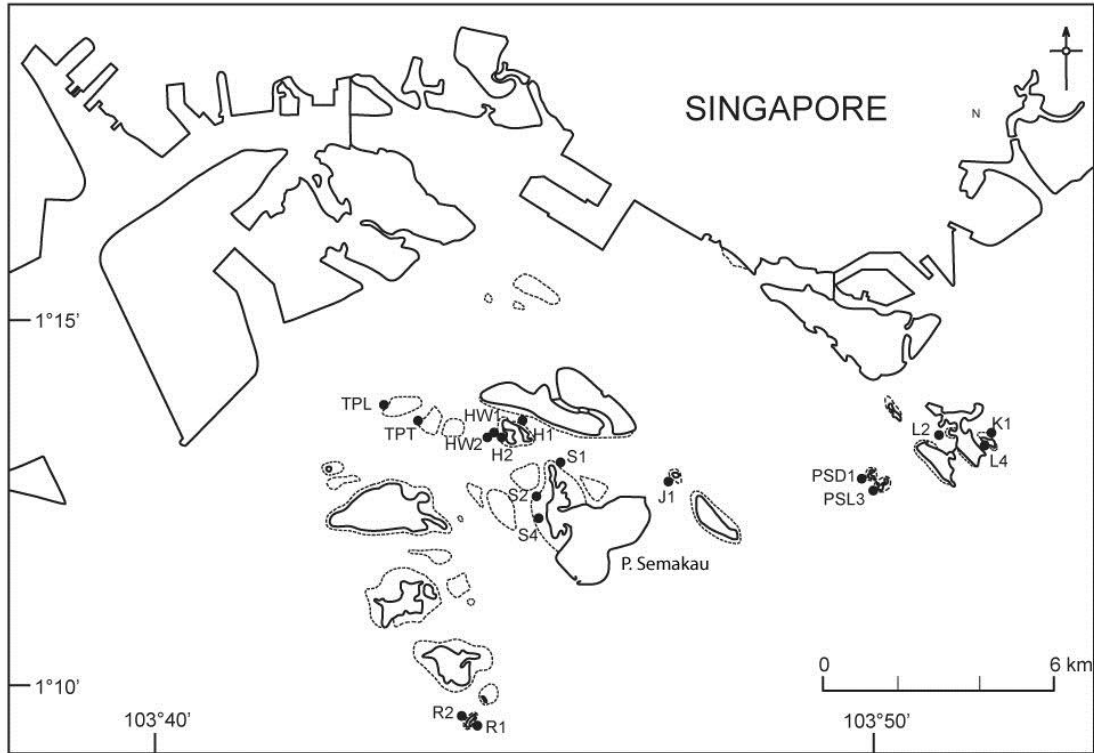

Fig. S1. Map of Singapore's southern islands showing study sites. See Table S1 & S2 for full site names and years when sites were surveyed. The map image is modified from Fig. 1 in Bauman et al. (2015)<sup>59</sup> and used with permission of the author.

Table S3. PERMANOVAs based on Bray-Curtis similarity measure of square-root transformed %covers of benthic communities before, in-between and after bleaching events during the study.\*

| Site                          |        |    |       |      |          |              |
|-------------------------------|--------|----|-------|------|----------|--------------|
| <b>H2</b>                     | Source | df | SS    | MS   | Pseudo-F | P(perm)      |
|                               | Pe     | 2  | 3737  | 1868 | 3.41     | <b>0.024</b> |
|                               | Ye(Pe) | 7  | 3897  | 557  | 1.33     | 0.129        |
|                               | Res    | 45 | 18802 | 418  |          |              |
|                               | Total  | 54 | 26431 |      |          |              |
| Pairwise tests: 1≠2, 1=3, 2=3 |        |    |       |      |          |              |
| <b>HW1</b>                    | Source | df | SS    | MS   | Pseudo-F | P(perm)      |
|                               | Pe     | 2  | 5143  | 2571 | 4.36     | <b>0.004</b> |
|                               | Ye(Pe) | 5  | 3005  | 601  | 2.58     | <b>0.000</b> |
|                               | Res    | 34 | 7930  | 233  |          |              |
|                               | Total  | 41 | 16484 |      |          |              |
| Pairwise tests: 1≠2, 1=3, 2=3 |        |    |       |      |          |              |
| <b>R2</b>                     | Source | df | SS    | MS   | Pseudo-F | P(perm)      |
|                               | Pe     | 2  | 2616  | 1308 | 2.46     | 0.078        |
|                               | Ye(Pe) | 6  | 3300  | 550  | 2.62     | <b>0.000</b> |
|                               | Res    | 39 | 8176  | 210  |          |              |
|                               | Total  | 47 | 14478 |      |          |              |
| <b>S2</b>                     | Source | df | SS    | MS   | Pseudo-F | P(MC)        |
|                               | Pe     | 2  | 6082  | 3041 | 3.01     | <b>0.026</b> |
|                               | Ye(Pe) | 5  | 5056  | 1011 | 4.43     | <b>0.000</b> |
|                               | Res    | 32 | 7296  | 228  |          |              |
|                               | Total  | 39 | 18433 |      |          |              |
| Pairwise tests: 1≠2, 1=3, 2=3 |        |    |       |      |          |              |

\*Period (Pe) was fixed with 3 levels ([1] pre-1997-98, [2] post-1998/pre-2010, [3] post-2010), Year (Ye) was random nested in Pe. The replicates were the transects (n=5). P-values were calculated using 9,999 permutations under a reduced model (H2,HW1,R2) or Monte-Carlo (S2).

Table S4. Results of SIMPER for benthic community structure for sites and time periods that had significant PERMANOVA result. Groups are years before and after coral bleaching events: group 1 = pre 1998 bleaching; group 2 = post 1998 bleaching/pre 2010 bleaching.

| <b>Site H2</b>                       |                 |                 |                |                |                 |              |
|--------------------------------------|-----------------|-----------------|----------------|----------------|-----------------|--------------|
| <b>Average dissimilarity = 32.98</b> |                 |                 |                |                |                 |              |
|                                      | Group 1         | Group 2         |                |                |                 |              |
| <b>Benthic category</b>              | <b>Av.Abund</b> | <b>Av.Abund</b> | <b>Av.Diss</b> | <b>Diss/SD</b> | <b>Contrib%</b> | <b>Cum.%</b> |
| <b>Macroalgae</b>                    | 2.05            | 3.01            | 5.09           | 1.35           | 15.43           | 15.43        |
| <b>Rubble</b>                        | 3.15            | 4.01            | 4.93           | 1.31           | 14.96           | 30.39        |
| <b>Sand</b>                          | 2.45            | 0.56            | 4.83           | 1.53           | 14.64           | 45.03        |
| <b>Hard coral</b>                    | 6.64            | 6.31            | 3.36           | 1.42           | 10.18           | 55.21        |
| <b>Silt</b>                          | 0.16            | 1.52            | 3.36           | 1.37           | 10.17           | 65.38        |
| <b>EAM</b>                           | 3.86            | 4.32            | 2.95           | 1.06           | 8.96            | 74.34        |
| <b>Sponge</b>                        | 1.25            | 1.1             | 2.62           | 1.47           | 7.93            | 82.27        |
| <b>Other biota</b>                   | 1.03            | 0.89            | 2.37           | 1.23           | 7.18            | 89.46        |
| <b>Zooanthid</b>                     | 0.47            | 0.72            | 1.86           | 1.05           | 5.63            | 95.09        |
| <b>Site HW1</b>                      |                 |                 |                |                |                 |              |
| <b>Average dissimilarity = 30.38</b> |                 |                 |                |                |                 |              |
|                                      | Group 1         | Group 2         |                |                |                 |              |
| <b>Benthic category</b>              | <b>Av.Abund</b> | <b>Av.Abund</b> | <b>Av.Diss</b> | <b>Diss/SD</b> | <b>Contrib%</b> | <b>Cum.%</b> |
| <b>Rubble</b>                        | 2.77            | 5.11            | 6.08           | 1.51           | 20.02           | 20.02        |
| <b>Silt</b>                          | 1.59            | 2.94            | 4.43           | 1.43           | 14.59           | 34.61        |
| <b>Macroalgae</b>                    | 2.42            | 4.2             | 4.43           | 1.46           | 14.57           | 49.18        |
| <b>Hard coral</b>                    | 6.19            | 4.5             | 4.33           | 1.65           | 14.26           | 63.44        |
| <b>EAM</b>                           | 5.42            | 3.98            | 3.45           | 1.45           | 11.36           | 74.8         |
| <b>Sand</b>                          | 0.55            | 1.42            | 2.96           | 1.2            | 9.75            | 84.56        |
| <b>Sponge</b>                        | 1.95            | 1.03            | 2.83           | 1.51           | 9.31            | 93.87        |
| <b>Site S2</b>                       |                 |                 |                |                |                 |              |
| <b>Average dissimilarity = 36.25</b> |                 |                 |                |                |                 |              |
|                                      | Group 1         | Group 2         |                |                |                 |              |
| <b>Benthic category</b>              | <b>Av.Abund</b> | <b>Av.Abund</b> | <b>Av.Diss</b> | <b>Diss/SD</b> | <b>Contrib%</b> | <b>Cum.%</b> |
| <b>Rubble</b>                        | 2.41            | 5.6             | 7.64           | 1.69           | 21.07           | 21.07        |
| <b>Macroalgae</b>                    | 1.81            | 4.68            | 7.46           | 1.6            | 20.58           | 41.65        |
| <b>Hard coral</b>                    | 7.42            | 4.84            | 6.14           | 2.16           | 16.94           | 58.59        |
| <b>EAM</b>                           | 4.5             | 3.39            | 3.36           | 1.58           | 9.26            | 67.85        |
| <b>Other biota</b>                   | 1.51            | 1.01            | 2.59           | 1.47           | 7.15            | 75           |
| <b>Silt</b>                          | 0.94            | 0.69            | 2.5            | 1.11           | 6.89            | 81.89        |
| <b>Sponge</b>                        | 1.29            | 0.78            | 2.23           | 1.38           | 6.14            | 88.04        |
| <b>Sand</b>                          | 0.26            | 0.66            | 1.8            | 0.73           | 4.96            | 93           |

Table S5. PERMANOVAs based on Bray-Curtis similarity measure of square-root transformed %covers of coral taxa before, in-between and after bleaching events during the study.\*

| <b>H2</b>  | <b>Source</b>         | <b>df</b> | <b>SS</b> | <b>MS</b> | <b>Pseudo-F</b> | <b>P(perm)</b> |
|------------|-----------------------|-----------|-----------|-----------|-----------------|----------------|
|            | Pe                    | 2         | 4280.2    | 2140.1    | 1.396           | 0.0802         |
|            | Ye(Pe)                | 7         | 10740     | 1534.3    | 1.0223          | 0.4214         |
|            | Res                   | 36        | 54029     | 1500.8    |                 |                |
|            | Total                 | 45        | 69061     |           |                 |                |
| <b>HW1</b> | <b>Source</b>         | <b>df</b> | <b>SS</b> | <b>MS</b> | <b>Pseudo-F</b> | <b>P(MC)</b>   |
|            | Pe                    | 2         | 13941     | 6970.7    | 5.0482          | <b>0.0003</b>  |
|            | Ye(Pe)                | 4         | 5523.2    | 1380.8    | 1.1826          | 0.2411         |
|            | Res                   | 28        | 32692     | 1167.6    |                 |                |
|            | Total                 | 34        | 52156     |           |                 |                |
|            | Pairwise tests: 1≠2=3 |           |           |           |                 |                |
| <b>R2</b>  | <b>Source</b>         | <b>df</b> | <b>SS</b> | <b>MS</b> | <b>Pseudo-F</b> | <b>P(perm)</b> |
|            | Pe                    | 2         | 8154.1    | 4077.1    | 3.5699          | <b>0.0001</b>  |
|            | Ye(Pe)                | 6         | 6694.5    | 1115.7    | 1.0789          | 0.3102         |
|            | Res                   | 34        | 35161     | 1034.2    |                 |                |
|            | Total                 | 42        | 49930     |           |                 |                |
|            | Pairwise tests: 1≠2=3 |           |           |           |                 |                |
| <b>S2</b>  | <b>Source</b>         | <b>df</b> | <b>SS</b> | <b>MS</b> | <b>Pseudo-F</b> | <b>P(MC)</b>   |
|            | Pe                    | 2         | 10455     | 5227.4    | 1.694           | 0.071          |
|            | Ye(Pe)                | 5         | 15429     | 3085.9    | 2.7543          | <b>0.0001</b>  |
|            | Res                   | 32        | 35852     | 1120.4    |                 |                |
|            | Total                 | 39        | 61736     |           |                 |                |

\*Period (Pe) was fixed with 3 levels ([1] pre-1997-98, [2] post-1998/pre-2010, [3] post-2010), Year (Ye) was random nested in Pe. The replicates were the transects (n=5). P-values were calculated using 9,999 permutations under a reduced model (H2,R2) or Monte-Carlo (HW1,S2).



Table S6. Results of SIMPER for taxonomic community structure for sites that had significant PERMANOVA result. Groups are years before and after coral bleaching events: group 1 pre 1998 bleaching; group 2 post 1998 bleaching/pre 2010 bleaching and; group 3 post 2010 bleaching.

| <b>Site HW1</b>                      |               |          |               |         |          |       |
|--------------------------------------|---------------|----------|---------------|---------|----------|-------|
| <b>Time periods 1 &amp; 2</b>        |               |          |               |         |          |       |
| <b>Average dissimilarity = 58.86</b> |               |          |               |         |          |       |
|                                      | <b>Time 1</b> |          | <b>Time 2</b> |         |          |       |
| <b>Genus</b>                         | Av.Abund      | Av.Abund | Av.Diss       | Diss/SD | Contrib% | Cum.% |
| <i>Plerogyra</i>                     | 3.77          | 0.41     | 5.69          | 1.62    | 9.66     | 9.66  |
| <i>Astreopora</i>                    | 0.24          | 2.97     | 4.61          | 1.56    | 7.83     | 17.49 |
| <i>Pavona</i>                        | 2.85          | 0.66     | 4.01          | 1.46    | 6.8      | 24.3  |
| <i>Goniastrea</i>                    | 1.67          | 2.4      | 2.95          | 1.32    | 5.01     | 29.31 |
| <i>Cyphastrea</i>                    | 1.4           | 2.76     | 2.88          | 1.42    | 4.9      | 34.21 |
| <i>Dipsastraea</i>                   | 1.42          | 2.84     | 2.85          | 1.31    | 4.85     | 39.06 |
| <i>Fungia</i>                        | 2.03          | 0.55     | 2.65          | 1.51    | 4.5      | 43.55 |
| <i>Podabacia</i>                     | 0.47          | 1.48     | 2.45          | 0.95    | 4.16     | 47.71 |
| <i>Diploastrea</i>                   | 0.56          | 1.24     | 2.41          | 0.69    | 4.09     | 51.8  |
| <i>Pachyseris</i>                    | 0.74          | 1.73     | 2.4           | 1.37    | 4.07     | 55.87 |
| <i>Merulina</i>                      | 3.63          | 3.11     | 2.39          | 1.3     | 4.06     | 59.94 |
| <i>Echinopora</i>                    | 1.34          | 0.61     | 2.21          | 1.02    | 3.75     | 63.69 |
| <i>Platygyra</i>                     | 1             | 1.34     | 2.2           | 1.06    | 3.74     | 67.43 |
| <i>Oxypora</i>                       | 1.33          | 0        | 2.15          | 0.92    | 3.64     | 71.07 |
| <i>Montipora</i>                     | 0.94          | 0.72     | 2.07          | 0.81    | 3.53     | 74.6  |
| <i>Pectinia</i>                      | 3.19          | 3.49     | 1.88          | 1.11    | 3.2      | 77.79 |
| <i>Favites</i>                       | 0.41          | 1.12     | 1.88          | 1.05    | 3.19     | 80.98 |
| <i>Porites</i>                       | 0.77          | 1.04     | 1.74          | 1.13    | 2.96     | 83.94 |
| <i>Hydnophora</i>                    | 0.77          | 0        | 1.18          | 0.79    | 2        | 85.94 |
| <i>Galaxea</i>                       | 0.59          | 0.25     | 1.07          | 0.81    | 1.81     | 87.75 |
| <i>Goniopora</i>                     | 0.54          | 0.08     | 0.91          | 0.61    | 1.54     | 89.29 |
| <i>Leptoseris</i>                    | 0.12          | 0.37     | 0.7           | 0.47    | 1.19     | 90.48 |
| <b>Time periods 1 &amp; 3</b>        |               |          |               |         |          |       |
| <b>Average dissimilarity = 63.08</b> |               |          |               |         |          |       |
|                                      | <b>Time 1</b> |          | <b>Time 3</b> |         |          |       |
| <b>Genus</b>                         | Av.Abund      | Av.Abund | Av.Diss       | Diss/SD | Contrib% | Cum.% |
| <i>Plerogyra</i>                     | 3.77          | 0        | 6.38          | 1.75    | 10.12    | 10.12 |
| <i>Astreopora</i>                    | 0.24          | 3.29     | 5.24          | 1.49    | 8.31     | 18.43 |
| <i>Pavona</i>                        | 2.85          | 0.74     | 4.32          | 1.43    | 6.85     | 25.28 |
| <i>Cyphastrea</i>                    | 1.4           | 2.54     | 3.86          | 1.47    | 6.12     | 31.4  |
| <i>Favites</i>                       | 0.41          | 2.33     | 3.61          | 1.49    | 5.72     | 37.12 |
| <i>Pachyseris</i>                    | 0.74          | 1.97     | 3.04          | 1.28    | 4.81     | 41.94 |
| <i>Fungia</i>                        | 2.03          | 0.28     | 2.99          | 1.91    | 4.74     | 46.68 |
| <i>Pectinia</i>                      | 3.19          | 3.67     | 2.83          | 1.61    | 4.48     | 51.16 |
| <i>Porites</i>                       | 0.77          | 1.87     | 2.8           | 1.31    | 4.45     | 55.61 |

|                    |      |      |      |      |      |       |
|--------------------|------|------|------|------|------|-------|
| <i>Goniastrea</i>  | 1.67 | 0.77 | 2.54 | 1.22 | 4.03 | 59.64 |
| <i>Echinopora</i>  | 1.34 | 1.2  | 2.4  | 1.2  | 3.8  | 63.44 |
| <i>Dipsastraea</i> | 1.42 | 0.99 | 2.26 | 1.34 | 3.58 | 67.02 |
| <i>Oxypora</i>     | 1.33 | 0    | 2.24 | 0.92 | 3.54 | 70.57 |
| <i>Diploastrea</i> | 0.56 | 0.97 | 2.16 | 0.62 | 3.43 | 74    |
| <i>Platygyra</i>   | 1    | 0.8  | 2.05 | 0.89 | 3.25 | 77.24 |
| <i>Merulina</i>    | 3.63 | 3.72 | 1.97 | 1.08 | 3.13 | 80.37 |
| <i>Galaxea</i>     | 0.59 | 1.24 | 1.82 | 1.5  | 2.88 | 83.25 |
| <i>Montipora</i>   | 0.94 | 0    | 1.55 | 0.65 | 2.46 | 85.71 |
| <i>Hydnophora</i>  | 0.77 | 0    | 1.23 | 0.79 | 1.95 | 87.66 |
| <i>Goniopora</i>   | 0.54 | 0.3  | 1.11 | 0.72 | 1.76 | 89.42 |
| <i>Mycedium</i>    | 0.08 | 0.53 | 0.97 | 0.55 | 1.54 | 90.96 |

## Site R2

### Time periods 1 & 2

Average dissimilarity = 50.00

| Genus                | Time 1   |          | Time 2  |         | Contrib% | Cum.% |
|----------------------|----------|----------|---------|---------|----------|-------|
|                      | Av.Abund | Av.Abund | Av.Diss | Diss/SD |          |       |
| <i>Merulina</i>      | 1.95     | 3.92     | 3.67    | 1.3     | 7.34     | 7.34  |
| <i>Montipora</i>     | 5.83     | 4.01     | 3.4     | 1.21    | 6.79     | 14.14 |
| <i>Acropora</i>      | 2.24     | 0.86     | 2.92    | 1.29    | 5.84     | 19.98 |
| <i>Pavona</i>        | 2.09     | 2.2      | 2.23    | 1.24    | 4.47     | 24.45 |
| <i>Favites</i>       | 0.95     | 1.59     | 2.05    | 1.42    | 4.1      | 28.55 |
| <i>Diploastrea</i>   | 0.82     | 0.89     | 2.05    | 0.7     | 4.1      | 32.65 |
| <i>Goniastrea</i>    | 1.76     | 1.91     | 1.9     | 1.33    | 3.8      | 36.45 |
| <i>Porites</i>       | 1.81     | 2.55     | 1.9     | 1.22    | 3.79     | 40.24 |
| <i>Pachyseris</i>    | 1.25     | 1.91     | 1.89    | 1.35    | 3.79     | 44.02 |
| <i>Platygyra</i>     | 0.69     | 1.5      | 1.89    | 1.33    | 3.78     | 47.8  |
| <i>Hydnophora</i>    | 0.48     | 1.02     | 1.67    | 0.99    | 3.34     | 51.15 |
| <i>Echinopora</i>    | 0.28     | 1.07     | 1.59    | 0.98    | 3.17     | 54.32 |
| <i>Echinophyllia</i> | 0.18     | 1        | 1.57    | 0.91    | 3.13     | 57.45 |
| <i>Mycedium</i>      | 0.96     | 0.4      | 1.51    | 1.06    | 3.02     | 60.47 |
| <i>Pectinia</i>      | 2.85     | 2.75     | 1.51    | 1.19    | 3.01     | 63.49 |
| <i>Dipsastraea</i>   | 0.94     | 0.75     | 1.29    | 1.46    | 2.58     | 66.07 |
| <i>Oxypora</i>       | 0.84     | 0.12     | 1.25    | 0.79    | 2.5      | 68.57 |
| <i>Fungia</i>        | 0.59     | 0.75     | 1.25    | 1.19    | 2.5      | 71.06 |
| <i>Galaxea</i>       | 0.82     | 0.89     | 1.18    | 1.33    | 2.35     | 73.42 |
| <i>Symphyllia</i>    | 0.2      | 0.74     | 1.13    | 0.9     | 2.26     | 75.68 |
| <i>Plerogyra</i>     | 0.73     | 0.13     | 1.1     | 0.97    | 2.19     | 77.87 |
| <i>Millepora</i>     | 0.59     | 0.02     | 0.92    | 0.56    | 1.84     | 79.71 |
| <i>Lobophyllia</i>   | 0.3      | 0.46     | 0.88    | 0.83    | 1.75     | 81.47 |
| <i>Podabacia</i>     | 0.19     | 0.44     | 0.79    | 0.72    | 1.57     | 83.04 |
| <i>Pocillopora</i>   | 0.42     | 0.28     | 0.78    | 0.81    | 1.57     | 84.61 |
| <i>Goniopora</i>     | 0        | 0.44     | 0.64    | 0.63    | 1.29     | 85.89 |
| <i>Psammocora</i>    | 0.33     | 0.16     | 0.62    | 0.49    | 1.25     | 87.14 |
| <i>Lithophyllon</i>  | 0.27     | 0.21     | 0.58    | 0.65    | 1.15     | 88.29 |

|                   |      |      |      |      |      |       |
|-------------------|------|------|------|------|------|-------|
| <i>Cyphastrea</i> | 0.25 | 0.23 | 0.56 | 0.71 | 1.13 | 89.42 |
|-------------------|------|------|------|------|------|-------|

### Time periods 1 & 3

Average dissimilarity = 55.60

| Genus                | Time 1   |          | Time 3  |         | Contrib% | Cum.% |
|----------------------|----------|----------|---------|---------|----------|-------|
|                      | Av.Abund | Av.Abund | Av.Diss | Diss/SD |          |       |
| <i>Montipora</i>     | 5.83     | 2.76     | 4.73    | 1.32    | 8.51     | 8.51  |
| <i>Diploastrea</i>   | 0.82     | 2.49     | 3.88    | 1.04    | 6.98     | 15.49 |
| <i>Merulina</i>      | 1.95     | 4.02     | 3.5     | 1.47    | 6.3      | 21.79 |
| <i>Platygyra</i>     | 0.69     | 2.72     | 3.19    | 1.64    | 5.74     | 27.53 |
| <i>Acropora</i>      | 2.24     | 0.52     | 2.98    | 1.28    | 5.35     | 32.88 |
| <i>Goniastrea</i>    | 1.76     | 2.7      | 2.37    | 1.27    | 4.27     | 37.15 |
| <i>Echinophyllia</i> | 0.18     | 1.57     | 2.19    | 1.18    | 3.93     | 41.08 |
| <i>Favites</i>       | 0.95     | 1.99     | 2.17    | 1.72    | 3.91     | 44.99 |
| <i>Pectinia</i>      | 2.85     | 1.86     | 1.88    | 1.3     | 3.39     | 48.37 |
| <i>Porites</i>       | 1.81     | 1.2      | 1.82    | 1.25    | 3.27     | 51.64 |
| <i>Pavona</i>        | 2.09     | 1.78     | 1.8     | 1.22    | 3.23     | 54.87 |
| <i>Podabacia</i>     | 0.19     | 1.19     | 1.69    | 1.08    | 3.04     | 57.91 |
| <i>Oulophyllia</i>   | 0        | 1.04     | 1.6     | 0.74    | 2.89     | 60.8  |
| <i>Dipsastraea</i>   | 0.94     | 1.26     | 1.59    | 1.38    | 2.87     | 63.66 |
| <i>Galaxea</i>       | 0.82     | 1.29     | 1.46    | 1.34    | 2.63     | 66.3  |
| <i>Pocillopora</i>   | 0.42     | 1.13     | 1.42    | 1.4     | 2.55     | 68.85 |
| <i>Mycedium</i>      | 0.96     | 0.3      | 1.4     | 0.99    | 2.53     | 71.38 |
| <i>Pachyseris</i>    | 1.25     | 1.5      | 1.39    | 1.38    | 2.5      | 73.88 |
| <i>Oxypora</i>       | 0.84     | 0        | 1.18    | 0.74    | 2.12     | 76    |
| <i>Hydnophora</i>    | 0.48     | 0.51     | 1.1     | 0.77    | 1.98     | 77.98 |
| <i>Plerogyra</i>     | 0.73     | 0        | 1.04    | 0.93    | 1.88     | 79.86 |
| <i>Fungia</i>        | 0.59     | 0.45     | 1.04    | 0.98    | 1.87     | 81.73 |
| <i>Psammocora</i>    | 0.33     | 0.53     | 1.02    | 0.61    | 1.83     | 83.56 |
| <i>Echinopora</i>    | 0.28     | 0.59     | 0.97    | 0.89    | 1.74     | 85.3  |
| <i>Cyphastrea</i>    | 0.25     | 0.63     | 0.96    | 1.14    | 1.73     | 87.03 |
| <i>Symphyllia</i>    | 0.2      | 0.59     | 0.9     | 0.91    | 1.62     | 88.65 |
| <i>Millepora</i>     | 0.59     | 0        | 0.89    | 0.54    | 1.61     | 90.26 |
